# Supplementary material
Source: PubMed Central journal article supplement (PMC11323738)
Supplement: mbio.00144-24-s0001.pdf [file mbio.00144-24-s0001.pdf]

**Supplementary Figure 1. MALDI-TOF spectral profiles and characteristic peaks of three *Mucor* species in the mass range of 2 to 20 kDa: A. *Mucor circinelloides* (CBS 151457), B. *Mucor kunryangiensis* (CNUFC CY223), C. *Mucor germinans* (SM1517, CBS 121458). The mass spectra were obtained using the FlexAnalysis software (v. 3.4, Bruker Daltonics Inc.), performing baseline corrected, smoothed and normalized analyses.**

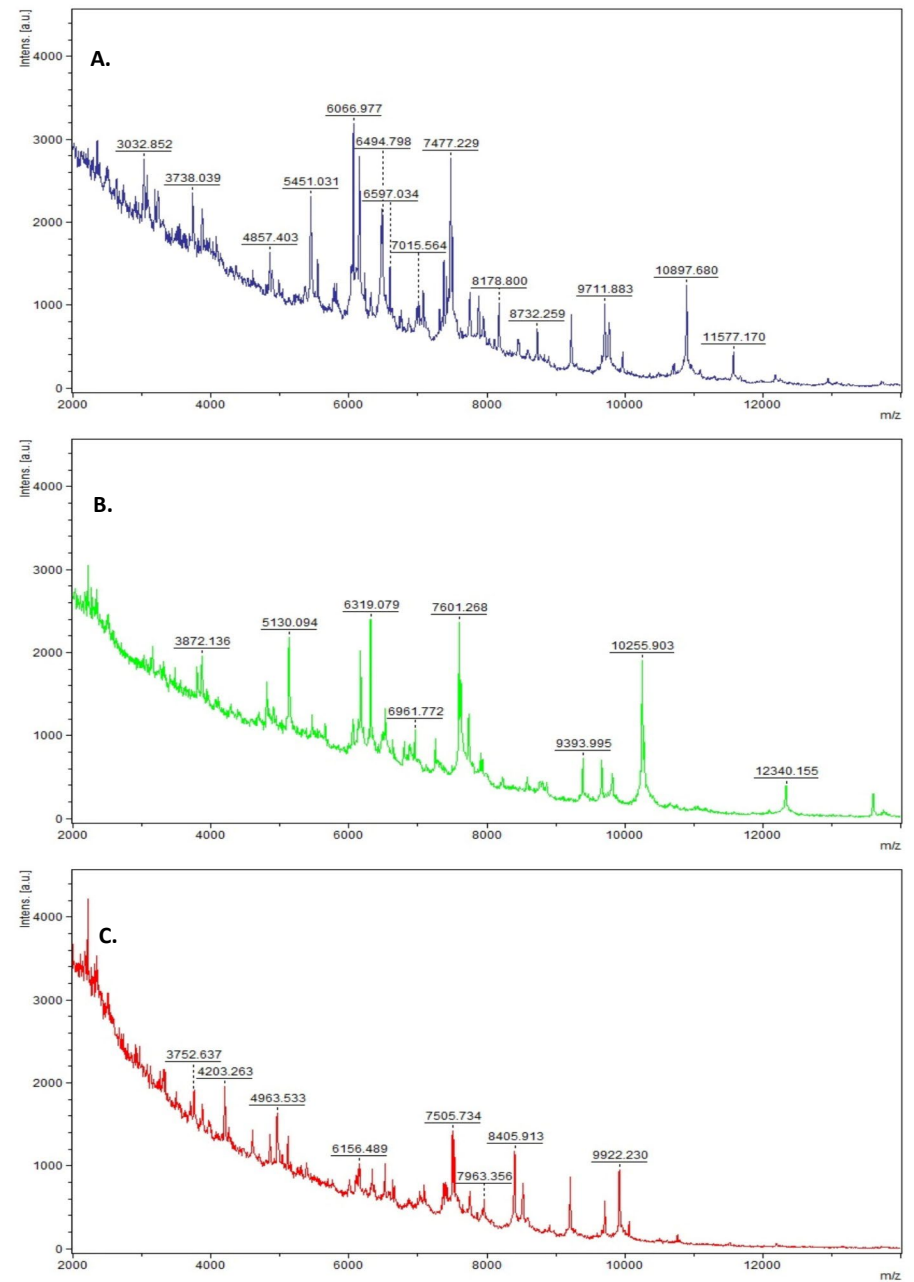

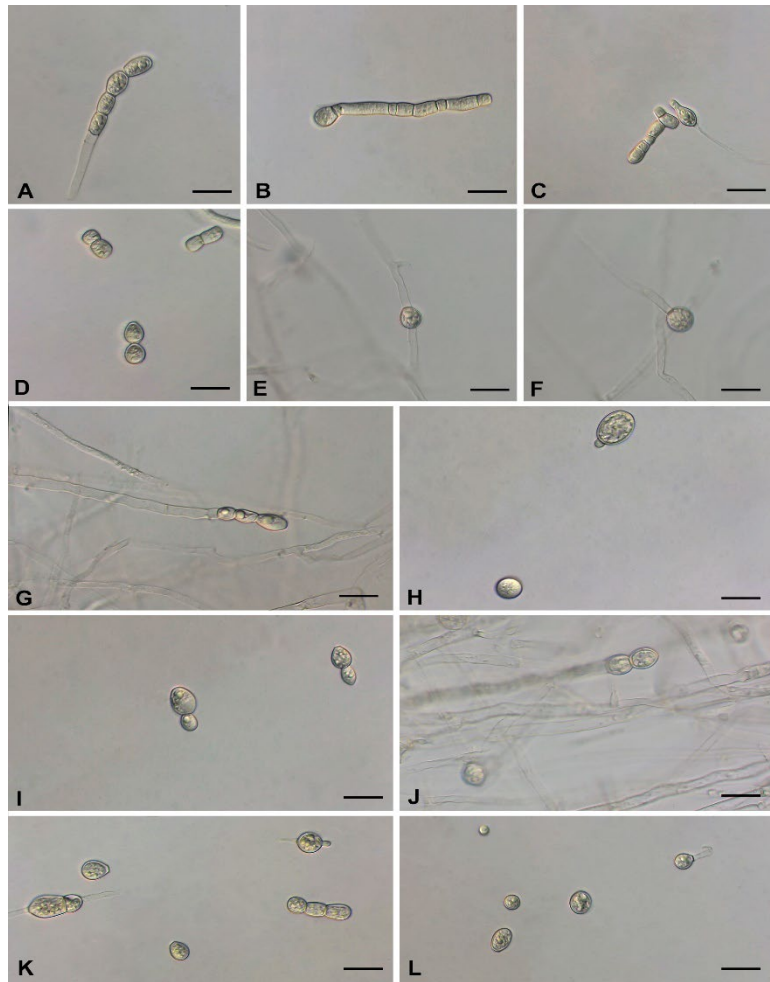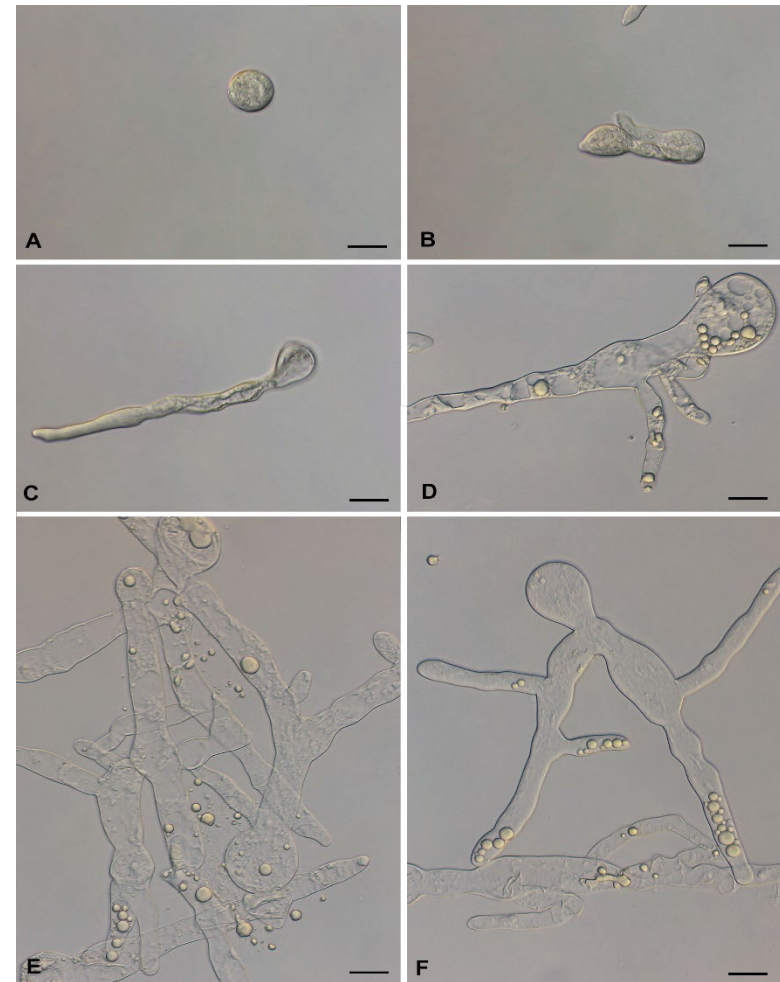

**Supplementary Figure 2. The characteristics of dimorphism in *Mucor circinelloides* at 25°C (left panel) and 37°C (right panel).** Left panel (A-F, the process of transition from filamentous to arthrospores to yeast like cells cultured at 25°C in RPMI 1640 without glucose. A, formation of septum hyphae. B and C, arthrospores. D, yeast-like cells. E and F, chlamydospores. G and I, predominantly filamentous form and budding yeast-like cells occasionally appearing in RPMI 1640 with 2% glucose. J-L, arthrospores and yeast like cells in RPMI 1640 with 4% glucose). **Right panel** (A and B, swollen cell and germ tube forming cells. C and D, inflated germ tube cells. E and F, cell with continuous swelling, rupture and death). Scale bars = 10  $\mu$ m.

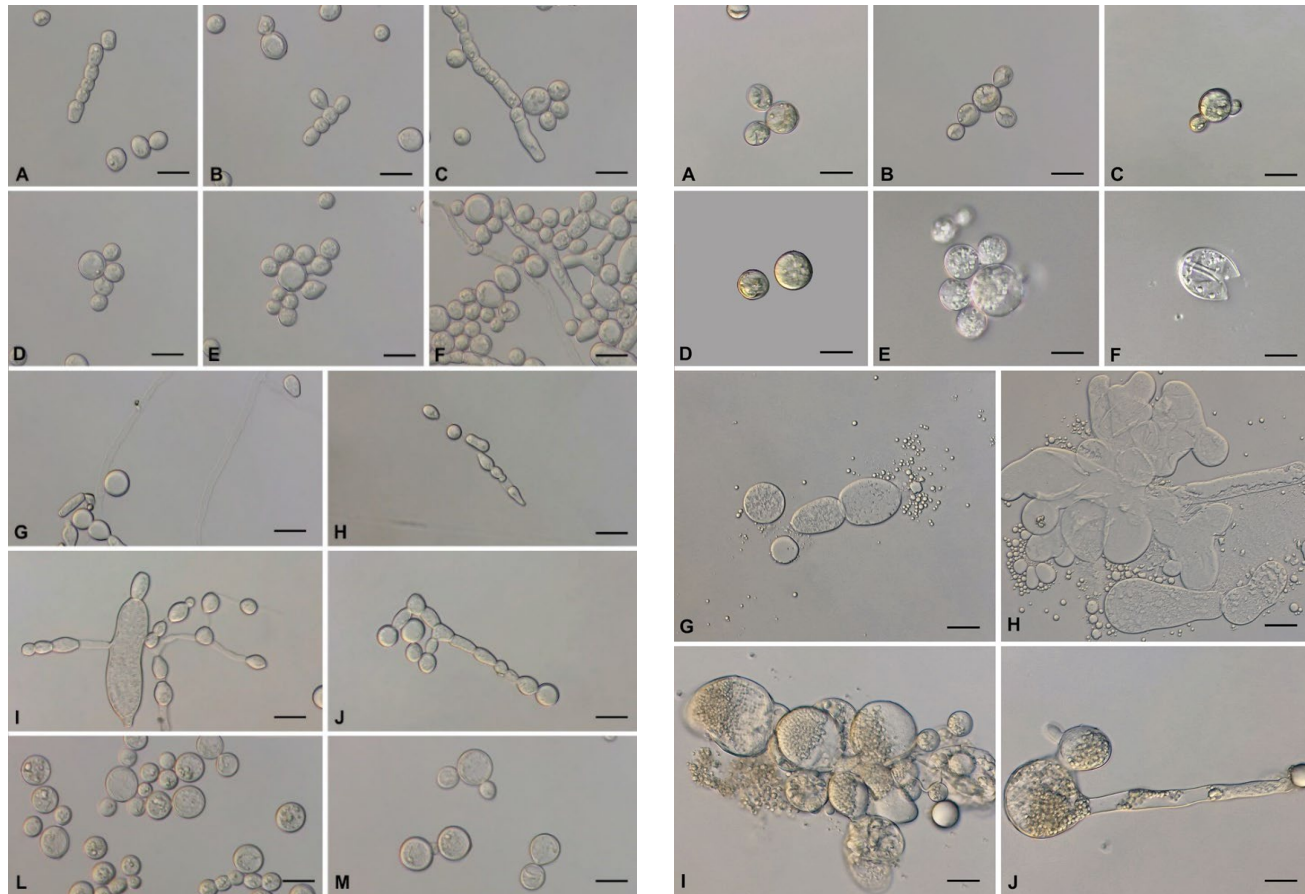

**Supplementary Figure 3. The characteristics of dimorphism in *Mucor kunryangriensis* at 25°C (left panel) and 37°C (right panel).** Left panel (A-F, the process of the yeast-like cell production cultured in RPMI 1640 without glucose. A-C, arthrospore formation and budding arthrospores. D-F, yeast-like cells. G-J, the process of the yeast-like cell production in RPMI 1640 with 2% glucose. G, occasional appearing hyphae (not clearly visible). H-J, arthrospores. L and M, yeast-like cells formed in RPMI 1640 with 4% glucose. Scale bars = 10 μm. Right panel (A-F, yeast-like cell production 37°C in RPMI1640 without glucose. G-J, cell with continuous swelling, rupture and death in RPMI1640 with 2% glucose and 4% glucose in 37°C). Scale bars = 10 μm.

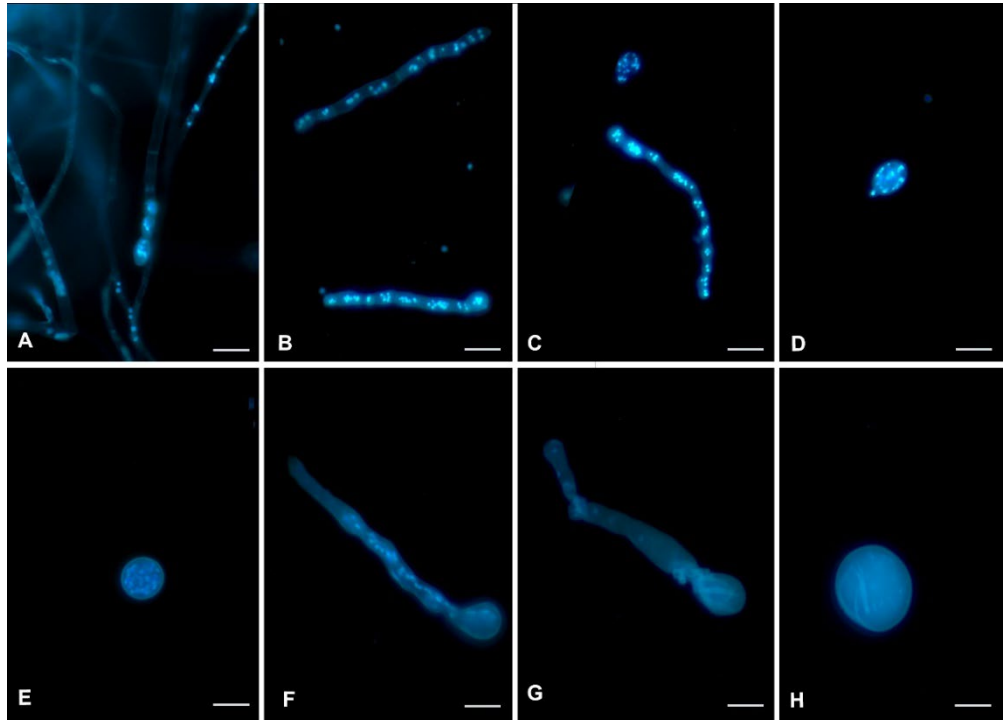

**Supplementary Figure 4. *Mucor circinelloides* multi-nucleate cells at 25°C and 37°C after fluorescent Hoechst 33258 staining. A-D. *Mucor circinelloides* at 25°C. A. Hyphae, B and C. Arthrospores.**

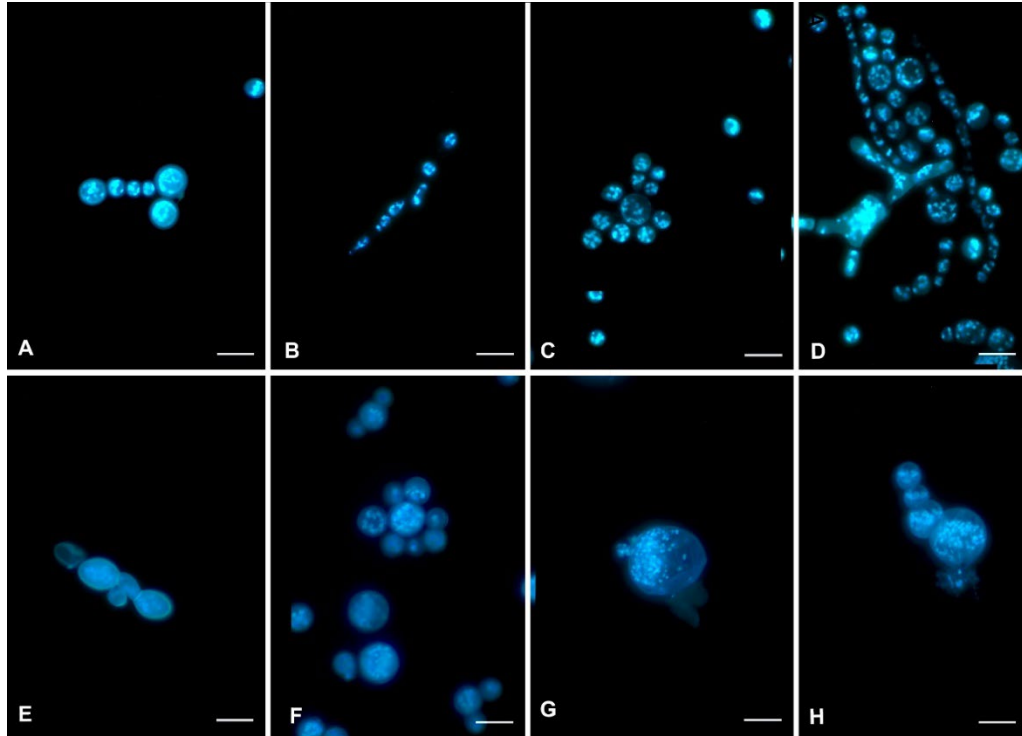

**Supplementary Figure 5. *Mucor kunryangriensis* multi-nucleate cells at 25°C and 37°C after fluorescent Hoechst 33258 staining. A-D. *Mucor kunryangriensis* at 25°C. A and B. Budding arthrospores, C. Yeast-like cells. E-F. *Mucor kunryangriensis* at 37°C. E and F. Yeast-like cells. G-H. Dead cells. Scale bars = 10  $\mu$ m.**
